# Supplementary material
Source: PubMed Central journal article supplement (PMC3480080)
Supplement: NIHMS335514-supplement-01.pdf [file NIHMS335514-supplement-01.pdf]

**Table 1. Characteristics of the donor corneas**

| Age                    | Sex |                                      | Post-mortem<br>Time (hr) | Preservation in wet<br>Chamber (hr) | Nerve lesion number<br>(Center/Periphery) |
|------------------------|-----|--------------------------------------|--------------------------|-------------------------------------|-------------------------------------------|
| <b>normal controls</b> |     |                                      |                          |                                     |                                           |
| 44                     | F   |                                      | 3                        | 45                                  | 0/2                                       |
| 45                     | M   |                                      | 4                        | 42                                  | 0/0                                       |
| 54                     | F   |                                      | 4                        | 37                                  | 0/3                                       |
| 57                     | F   |                                      | 5.5                      | 31                                  | 0/3                                       |
| 64                     | M   |                                      | 7                        | 34                                  | 0/9                                       |
| 67                     | M   |                                      | 2.5                      | 36                                  | 1/13                                      |
|                        |     |                                      | 4.2 ±1.5*                | 34.8 ±6.7                           |                                           |
| <b>IDDM</b>            |     |                                      |                          |                                     |                                           |
|                        |     | <b>Duration of<br/>diabetes (yr)</b> |                          |                                     |                                           |
| 43                     | M   | 5                                    | 3                        | 37                                  | 9/17                                      |
| 44                     | F   | 7                                    | 2                        | 31                                  | 7/11                                      |
| 45                     | M   | 2                                    | 4                        | 33                                  | 3/8                                       |
| 56                     | M   | 7                                    | 1.5                      | 30                                  | 4/10                                      |
| 58                     | F   | 13                                   | 5                        | 36                                  | 6/12                                      |
| 63                     | M   | 11                                   | 4.5                      | 27                                  | 2/15                                      |
| 64                     | M   | 5                                    | 2                        | 39                                  | 5/13                                      |
| 67                     | M   | 17                                   | 2                        | 32                                  | 4/16                                      |
|                        |     |                                      | 3.2 ±1.2                 | 33.8 ±7.6                           |                                           |

F: female; M: male; \* Data are expressed as average percent standard deviation (SD).
